# Supplementary material
Source: publisher figshare collection journal article supplement (https://sage.figshare.com/ndownloader/files/18542123)
Supplement: Supplementary file 1 [file 18542123]

***Supplementary File***

| **Table 1. Topical corticosteroids containing propylene glycol (60)** | |
| --- | --- |
| **Low potency corticosteroids (6-7)** | - Hyderm 1% (cream) - Cortifoam (foam 10%) - Emo-cort 1% (cream) - Euro-Hydrocortisone 1% (cream) - Jamp-Hydrocortisone 1% (cream) - M-HC 1% (cream) - Emo-cort 1% (lotion) - Jamp-Hydrocortisone 1% (oinment) - Emo-cort (cream 2.5%) |
| **Moderate potency corticosteroids (4-5)** | - Hydroval (cream) - Hydroval (oinment) - Taro-mometasone (cream) - Elocom (lotion) - Taro-mometasone (lotion) - Elocom (oinment) - Taro-mometasone (oinment) - PSM-mometasone (oinment) - Ratio-mometasone (oinment) - Dermatop (oinment) - Triaderm (cream) |
| **High potency corticosteroids (2-3)** | - Cyclocort (oinment) - Ratio-amcinonide (oinment) - Taro-amcinonide (oinment) - Ratio-topisone (cream) - Taro-sone (cream) - Diprolene (cream) - Ratio-topilene (cream) - Diprolene (lotion) - Ratio-topilene (lotion) - Diprolene (oinment) - Ratio-topilene (oinment) - Betaderm 0,05% (cream) - Betaderm 0,1 % (cream) - Luxiq (capillar foam 0,12%) - Topicort (oinment 0,25%) - Lyderm (cream) - Lidemol (cream) - Lidex (cream) - Tiamol (cream) - Lyderm (oinment) - Lidex (oinment) - Lyderm (gel) - Lidex (gel) |
| **Super high potency corticosteroids (1)** | - Dermovate (cream) - Mylan Clobetasol (cream) - PMS-Clobetasol (cream) - Ratio- Clobetasol (cream) - Taro Clobetasol (cream) - Dermovate (oinment) - Mylan Clobetasol (oinment) - Taro Clobetasol (oinment) - Olux-E (foam) - Ultravate (oinment) |
| **Treaments containing corticosteroids** | - Procto-foam HC (rectal foam) - Jamp-Hydro-cortisone Acetate-Urea (cream) - Jamp-Hydro-cortisone Acetate-Urea (lotion) - M-HC-Urea (lotion) - Xerese (cream) - Viaderm KC (cream) - Lotriderm (cream) |

| **Table 2. Topical corticosteroids containing parabens (39)** | |
| --- | --- |
| **Low potency corticosteroids (6-7)** | - Jamp-HC 1% (cream) - M-HC Acetate 1% (cream) - Cortifoam (foam 10%) - PDP-Desonide (cream) - PMS-Desonide (cream) - Cortivera-H (cream) - Cortivera Plus (cream) - Emo-cort 1% (cream) - Jamp-Hydrocortisone 1% (cream) - M-HC 1% (cream) - Emo-cort 1% (lotion) - Jamp-Hydrocortisone 1% (lotion) - M-HC 1% (lotion) - Emo-cort (cream 2.5%) |
| **Moderate potency corticosteroids (4-5)** | - Hydroval (cream) - Hydroval (oinment) |
| **High potency corticosteroids (2-3)** | - Ratio-topisone (cream) - Ratio-topilene (cream) |
| **Super high potency corticosteroids (1)** | - Ratio-ectosone (cream 0.05%) - Ratio-ectosone (lotion 0.05%) - Ratio-ectosone (cream 0.25%) - Ratio-ectosone (lotion 0.25%) - Beteflam (topical patch) - Topicort (cream 0.05%) - Topicort (cream 0.25%) |
| **Treaments containing corticosteroids** | - Anugesic-HC (oinment) - Proctodan HC (oinment) - Anusol-HC (oinment) - Anodan-HC (oinment) - Egozinc-HC (oinment) - Jampzinc-HC (oinment) - Jamp-Hydrocortisone Acetate-Urea (cream) - Jamp-Hydrocortisone Acetate-Urea (lotion) - Procto-foam HC (rectal foam) - Jamp-Hydro-cortisone Acetate-Urea (cream) - M-HC-Urea (cream) - Jamp-Hydro-cortisone Acetate-Urea (lotion) - M-HC-Urea (lotion) - Viaderm KC (cream) |

| T**able 3. Topical corticosteroids containing chlorocresol (16)** | |
| --- | --- |
| **Low potency corticosteroids (6-7)** | Euro-Hydrocortisone 1% (cream) |
| **Moderate potency corticosteroids (4-5)** | - Spectro-eczema care |
| **High potency corticosteroids (2-3)** | - Diprosone (cream - Taro-sone (cream) - Celestoderm V/2 (cream) - Betaderm 0.05% (cream) - Betaderm 0.05% (oinment) - Celestoderm V (cream) - Betaderm 0.1% (cream) - Betaderm 0.1% (oinment) |
| **Super high potency corticosteroids (1)** | - Dermovate (cream) - Mylan Clobetasol (cream) - PMS-Clobetasol (cream) - Ratio- Clobetasol (cream) - Taro Clobetasol (cream) |
| **Treaments containing corticosteroids** | - Valisone G (cream) |

| **Table 4. Topical corticosteroids containing formaldehyde-releasers (10)** |
| --- |
| Diazolidinylurea :   - Jamp-Hydrocortisone 1% (cream) - M-HC 1% (cream) - Ultravate (cream) - Jampzinc-HC (ointment) |
| DMDM Hydantoin:   - Dermaflex HC (cream) - Dermaflex HC (lotion) |
| Imidazolidinyl urea (Germaben II):   - Emo-cort 1% (cream) - Emo-cort 1% (lotion) - Emo-cort 2.5% (cream) - Anodan-HC (ointment) |

| **Table 5. Topical corticosteroids containing lanolin (6)** | |
| --- | --- |
| **Moderate potency corticosteroids (4-5)** | - Dermatop (cream) |
| **High potency corticosteroids (2-3)** | - Topicort 0,05% (cream) - Topicort 0,25% (cream) |
| **Treaments containing corticosteroids** | - Dermaflex HC (lotion) - Protosedyl (ointment) - Sandoz Proctomyxin HC (ointment) |

| **Table 6. Topical corticosteroids containing bees wax (6)** | |
| --- | --- |
| **Low potency corticosteroids (6-7)** | - Jamp-Hydrocortisone 1% (ointment) |
| **Moderate potency corticosteroids (4-5)** | - Spectro-eczema care |
| **High potency corticosteroids (2-3)** | - Topicort 0,25% (ointment) |
| **Super high potency corticosteroids (1)** | - Mylan Clobetasol (cream) - Ultravate (ointment) |
| **Treaments containing corticosteroids** | - Jamp-Hydro-cortisone Acetate-Urea (cream) |

| **Table 7. Topical corticosteroids WITHOUT any of the 28 ingredients with stronger allergenic potential (33)** | |
| --- | --- |
| **Low potency corticosteroids (6-7** | - PDP-Desonide (ointment) - PMS-Desonide (ointment) - Synalar (ointment) - M-HC 1% protection (cream) - Prevex HC - Cortoderm (ointment) |
| **Moderate potency corticosteroids (4-5)** | - Elocom (lotion) - Aristocort-R (cream and ointment) - Oracort dental paste |
| **High potency corticosteroids (2-3)** | - Cyclocort (cream) - Ratio-amcinonide (cream) - Taro-amcinonide (cream) - Cyclocort (lotion) - Ratio-amcinonide (lotion) - Diprosone (lotion) - Diprosone (ointment) - Ratio-topisone (ointment) - Celestoderm V/2 (ointment) - Prevex B (cream) - Betaderm 0.1% (lotion) - Celestoderm V (ointment) - Aristocort-C (cream) |
| **Super high potency corticosteroids (1)** | - Dermovate (lotion) - Mylan-Clobetasol (lotion) - Taro-Clobetasol (lotion) - Ratio Clobetasol (ointment) - Clobex spray |
| **Treaments containing corticosteroids** | - Viaderm KC (ointment) - Diprosalic 2% (lotion) - Diprosalic 3% ointment) - Valisone (scalp lotion) - Valisone G (ointment) |

| **Table 8. Topical corticosteroids WITHOUT propylene glycol (80)** |
| --- |
| - Hydrocortisone acetate   - Jamp-HC 1% (cream)   - M-HC Acetate 1% (cream) - Desonide 0,05%   - PDP-Desonide (cream)   - PMS-Desonide (cream)   - PDP-Desonide (ointment)   - PMS-Desonide (ointment) - Fluocinolone acetonide   - Derma-smoothe/FS 0,01% (topical oil)   - Synalar 0,025% (ointment) - Hydrocortisone 1%   - Cortivera-H (cream)   - Cortivera Plus (cream)   - M-HC 1% Protection(cream)   - Prevex HC (cream)   - Jamp-Hydrocortisone 1% (lotion)   - M-HC 1% (lotion)   - Cortoderm (ointment) - Clobetasone butyrate 0,05%   - Spectro-eczema care - Mometasone furoate 0,1%   - Elocom (cream) - Prednicarbate 0,1%   - Dermatop (cream) - Triamcinolone acetonide 0,1%   - Aristocort R (cream)   - Aristocort R (ointment)   - Oracort (dental paste) - Amcinonide 0,1%   - Cyclocort (Cream)   - Ratio-amcinonide (cream)   - Taro-amcinonide (cream)   - Cyclocort (Lotion)   - Ratio-amcinonide (lotion) - Betamethasone-diproprionate 0,05%   - Diprosone (cream)   - Diprosone (lotion)   - Ratio-topisone (lotion)   - Diprosone (ointment)   - Ratio-topisone (ointment) - Betamethasone valerate 0,05%   - Celestoderm V/2 (cream)   - Ratio-ectosone (cream)   - Ratio-ectosone (lotion)   - Celestoderm V/2 (ointment)   - Betaderm (ointment) - Betamethasone valerate 0,1%   - Celestoderm V (cream)   - Ratio-ectosone (cream)   - Prevex B (cream)   - Ratio-ectosone (lotion)   - Betaderm (scalp lotion)   - Ratio-ectosone (scalp lotion)   - Celestoderm V (ointment)   - Betaderm (ointment)   - Beteflam (Topical patch) - Desoximethasone   - Topicort mild (cream 0,05%)   - Topicort (gel 0,05%)   - Topicort (cream 0,25%) - Triamcinolone acetonide   - Aristocort C (cream 0,5%) - Clobetasol propionate 0,05 %   - Dermovate (scalp lotion)   - Mylan Clobetasol (scalp lotion)   - Ratio Clobetasol (scalp lotion)   - Taro Clobetasol (scalp lotion/topical)   - Ratio Clobetasol (ointment)   - Clobex (Shampoo)   - Clobex (spray) - Halobetasol propionate 0,05 %   - Ultravate (cream) |
| - Anugesic-HC (ointment) - Proctodan HC (ointment) - Anusol-HC (ointment) - Egozinc-HC (ointment) - Jampzinc-HC (ointment) - Jamp-Hydrocortisone Acetate 0.5%-Urea (cream) - Jamp-Hydrocortisone Acetate 0.5%-Urea (lotion) - Fucidin H (cream) - Dermaflex HC (cream) - M-HC-Urée (cream) - Dermaflex HC (lotion) - Protosedyl (ointment) - Sandoz Proctomyxin HC (ointment) - Viaderm KC (ointment) - Dovobet (ointment) - Dovobet (gel) - Enstilar (foam) - Diprosalic 2% (lotion) - Ratio topisalic (lotion) - Diprosalic 3% (ointment) - Valisone (Scalp Lotion/ointment/cream) |
